# Supplementary material
Source: PubMed Central journal article supplement (PMC4148190)
Supplement: supp_217.17.3122_JEB103309.pdf [file supp_217.17.3122_JEB103309.pdf]

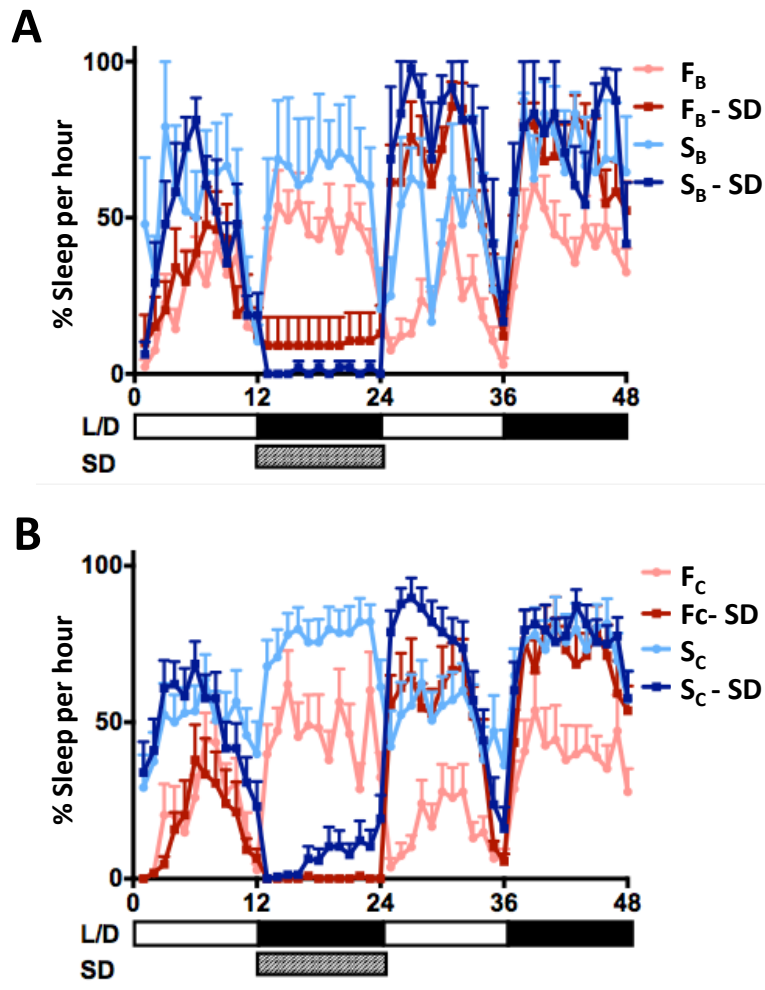

**Supplemental Fig. S1. Sleep rebound in B and C population flies.** (A,B) F and S flies from the B and C group were sleep-deprived from hours 12-24 (hashed bar) during the dark period. Both F and S flies display much more robust sleep rebounds compared to undisturbed controls ( $P < 0.001$  for all groups).
